# Supplementary material
Source: PubMed Central journal article supplement (PMC9226262)

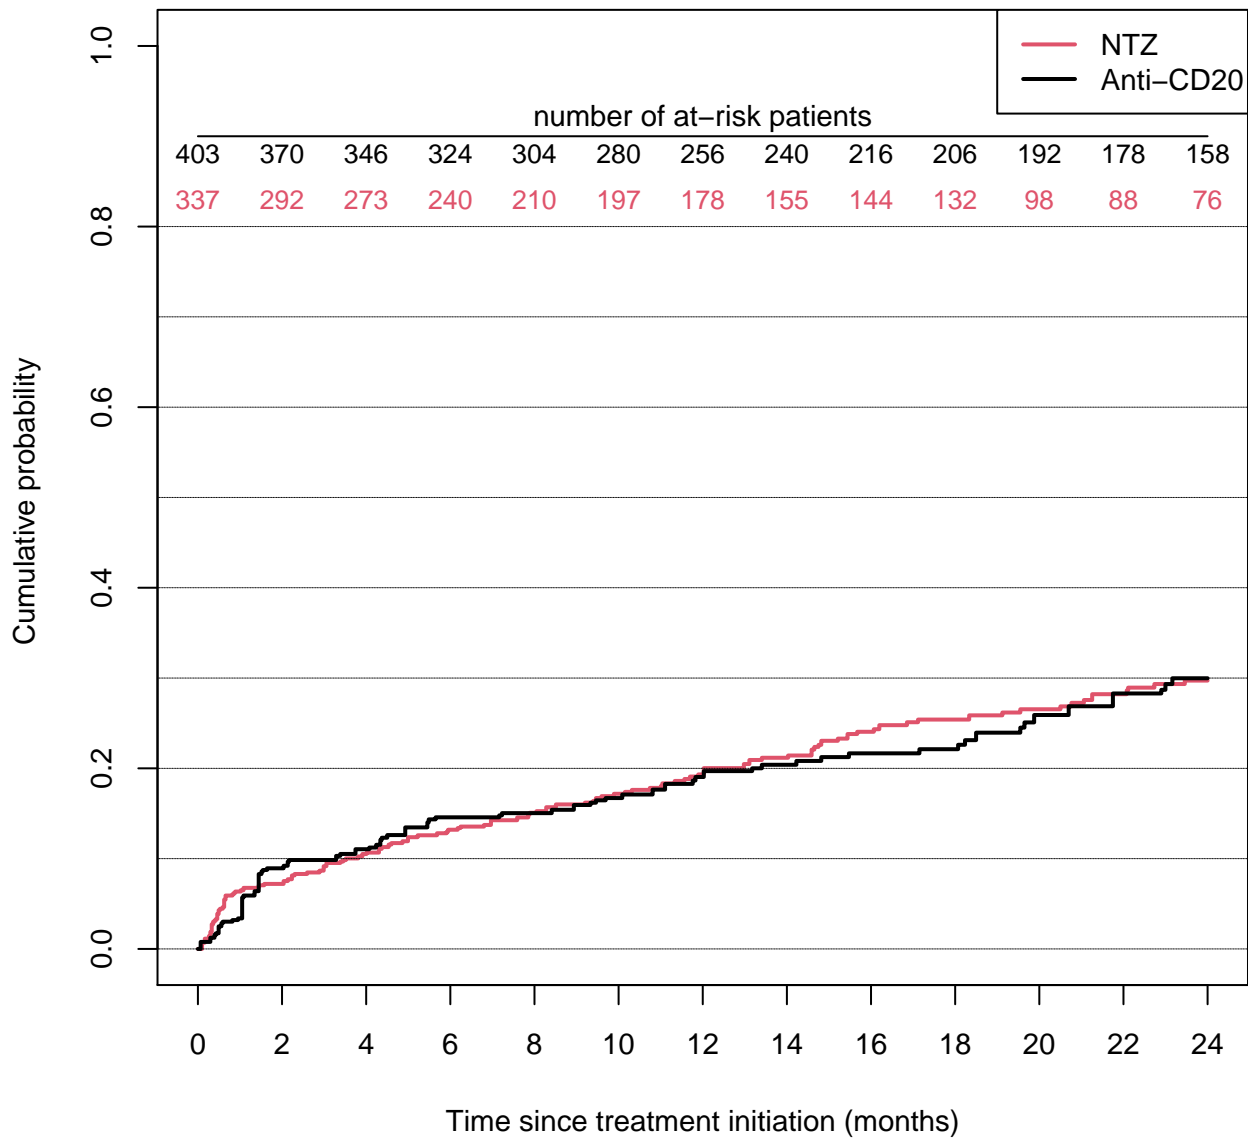

Supplement: 13311_2022_1202_MOESM37_ESM.pdf [file 13311_2022_1202_MOESM37_ESM.pdf]
